# Supplementary material for: High body temperature increases microbiota-dependent host resistance to influenza A virus and SARS-CoV-2 infection
Source: Research Square preprint supplement (doi:10.21203/rs.3.rs-1654765/v1), 2022-05-16
Supplement: Supplementary file 1 [file 834fbe77578c62372c438bfb.pdf]

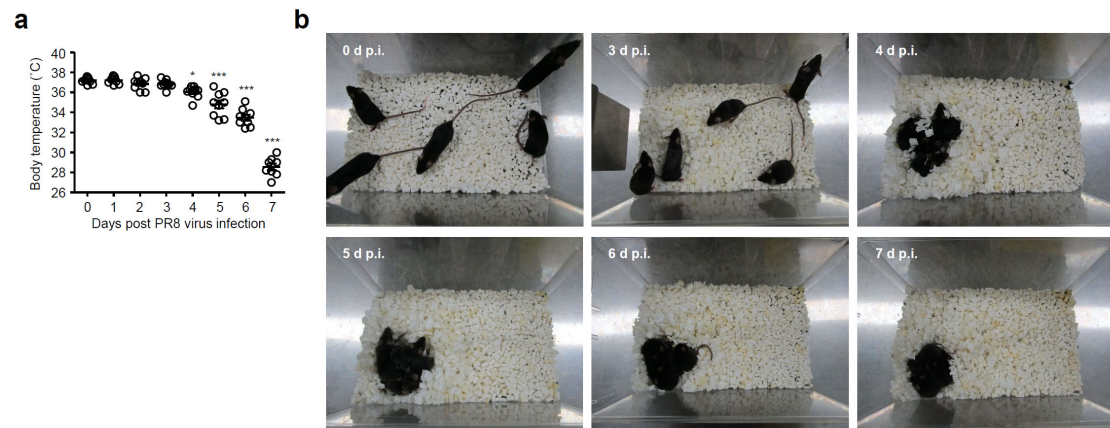

### Extended Data Figure 1

Changes of body temperature following influenza virus infection.

**a, b,** Mice kept at 22 °C were infected intranasally with 1,000 pfu of influenza virus. Core body temperatures (**a**) and activity of infected mice (**b**) were monitored for 7 days.

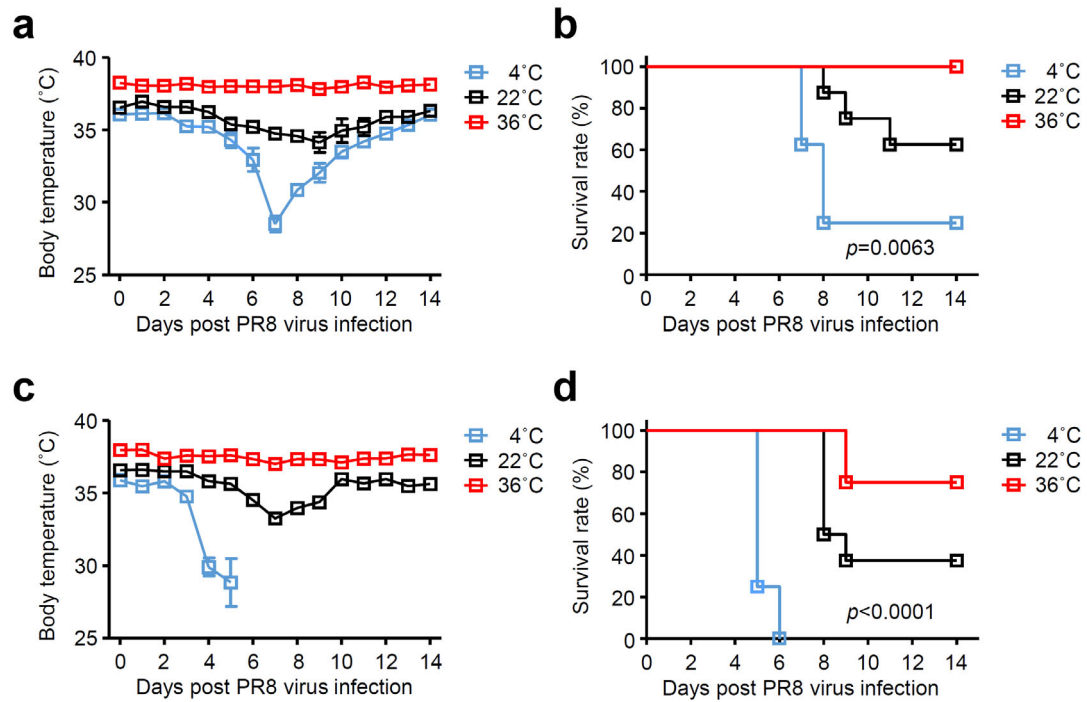

## Extended Data Figure 2

Core body temperature affects severity of influenza virus infection.

**a-d**, Mice were kept at 4, 22, or 36 °C for 7 d before influenza virus infection and throughout infection. Mice kept at 4, 22, or 36 °C were infected intranasally with 500 (**a, b**) or 2,000 (**c, d**) pfu of influenza virus. Core body temperatures (**a, c**) and mortality (**b, d**) were monitored for 14 days.

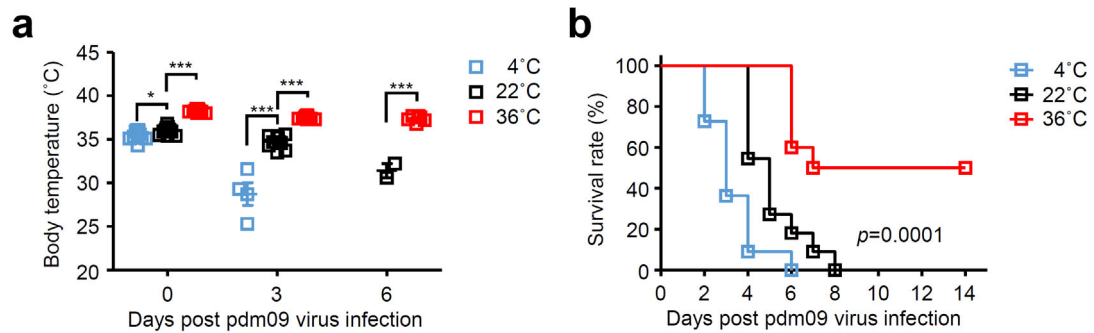

### Extended Data Figure 3

Core body temperature affects severity of influenza virus pdm09 infection.

**a, b,** Mice were kept at 4, 22, or 36 °C for 7 d before influenza virus infection and throughout infection. Mice kept at 4, 22, or 36 °C were infected intranasally with  $3 \times 10^4$  pfu of a human isolate of the 2009 pandemic influenza A virus strain A/Narita/1/2009 (pdm09). Core body temperatures (**a**) and mortality (**b**) were monitored for 14 days.

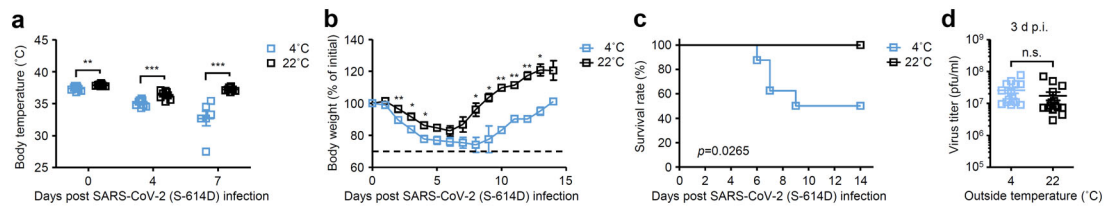

### Extended Data Figure 4

Effects of outside temperature on severity of SARS-CoV-2 infection.

**a-d**, Syrian hamsters were kept at 4 or 22 °C for 7 d before original SARS-CoV-2 (S-614D) infection and throughout infection. Hamsters kept at 4 or 22 °C were infected intranasally with  $1.5 \times 10^6$  pfu of an original SARS-CoV-2 (S-614D) strain. Core body temperatures (**a**), weight loss (**b**), mortality (**c**), and virus titer in the lung wash (**d**) were measured on indicated days after challenge. The dashed line indicates the limit of endpoint.

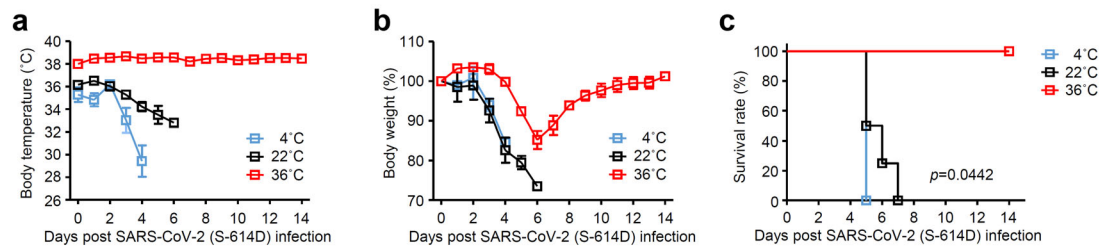

## Extended Data Figure 5

Core body temperature affects severity of SARS-CoV-2 infection.

**a-c**, K18-hACE2 mice were kept at 4, 22, or 36 °C for 7 d before original SARS-CoV-2 (S-614D) infection and throughout infection. K18-hACE2 mice kept at 4, 22, or 36 °C were infected intranasally with  $5 \times 10^4$  pfu of an original SARS-CoV-2 (S-614D) strain. Core body temperatures (**a**), weight loss (**b**), and mortality (**c**) were monitored for 14 days.

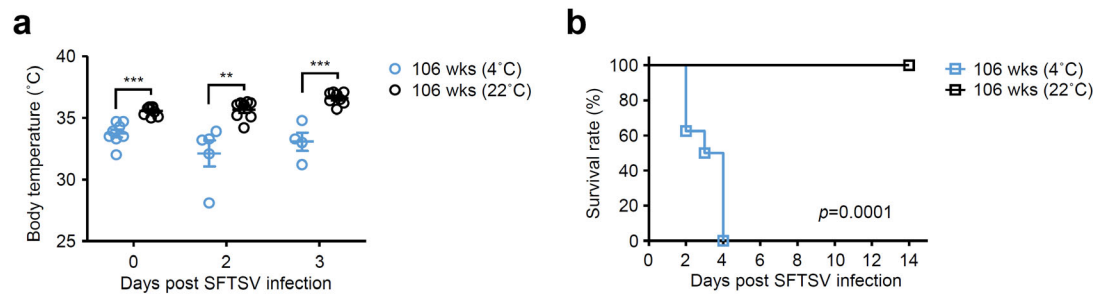

### Extended Data Figure 6

Effects of outside temperature on severity of SFTSV infection.

**a, b,** One hundred six-weeks-old mice were kept at 4 or 22 °C for 7 d before SFTSV infection and throughout infection. 106-weeks-old mice kept at 4 or 22°C were infected intravenously with  $5 \times 10^6$  TCID<sub>50</sub> of SFTSV. Core body temperatures (**a**) and mortality (**b**) were measured on indicated days after challenge.

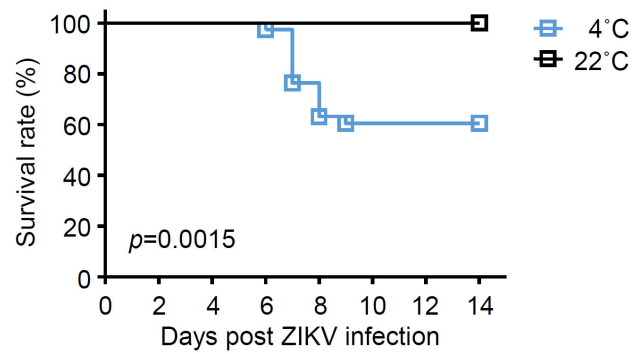

### Extended Data Figure 7

Effects of outside temperature on severity of ZIKV infection.

Mice were kept at 4 or 22 °C for 7 d before ZIKV infection and throughout infection. Mice kept at 4 or 22°C were infected intravenously with  $1.5 \times 10^7$  pfu of ZIKV. Mortality was monitored for 14 days.

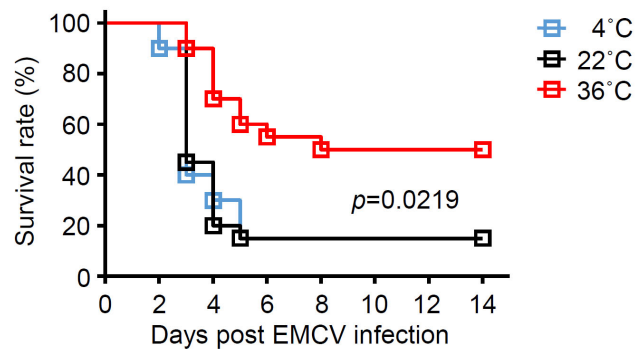

### Supplementary Data Figure 8

Effects of outside temperature on severity of EMCV infection.

Mice were kept at 4, 22, or 36 °C for 7 d before EMCV infection and throughout infection. Mice kept at 4, 22, or 36 °C were infected intraperitoneally with 100 pfu of EMCV. Mortality was monitored for 14 days.

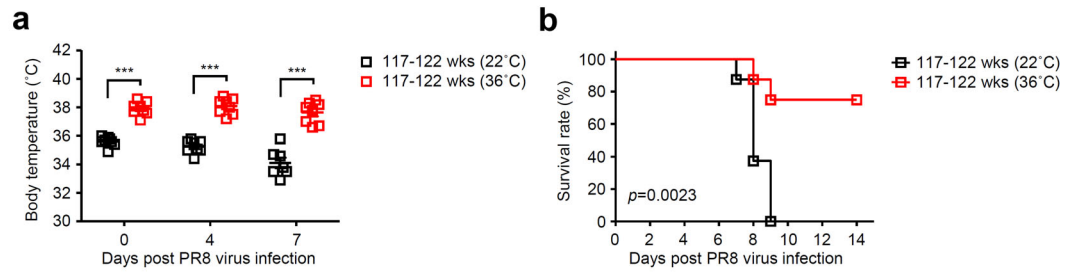

### Extended Data Figure 9

High-heat exposure of aged mice had improved survival after influenza virus infection.

**a, b,** One hundred seventeen- to 122-weeks-old mice were kept at 22 or 36 °C for 7 d before influenza virus infection and throughout infection. Mice kept at 22 or 36°C were infected intranasally with 1,000 pfu of influenza virus. Core body temperatures (**a**) and mortality (**b**) were measured on indicated days after challenge.

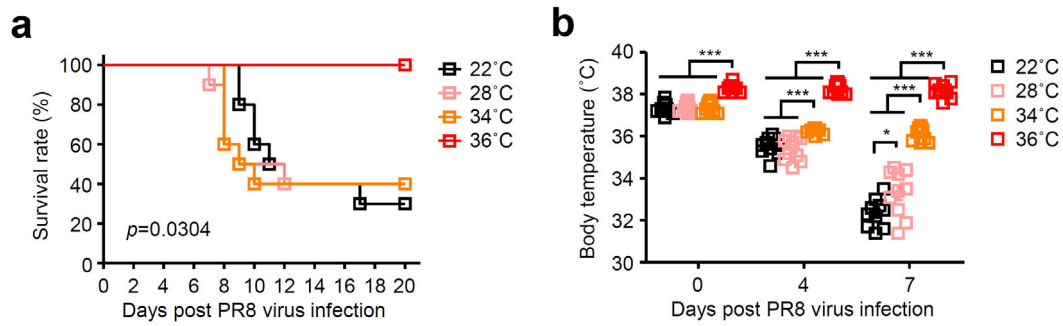

### Extended Data Figure 10

Effects of outside temperature on severity of influenza virus infection.

**a, b**, Mice were kept at 22, 28, 34, or 36 °C for 7 d before influenza virus infection and throughout infection. Mice kept at 22, 28, 34, or 36 °C were infected intranasally with influenza virus. Mortality (**a**) and core body temperatures (**b**) were measured on indicated days after challenge.

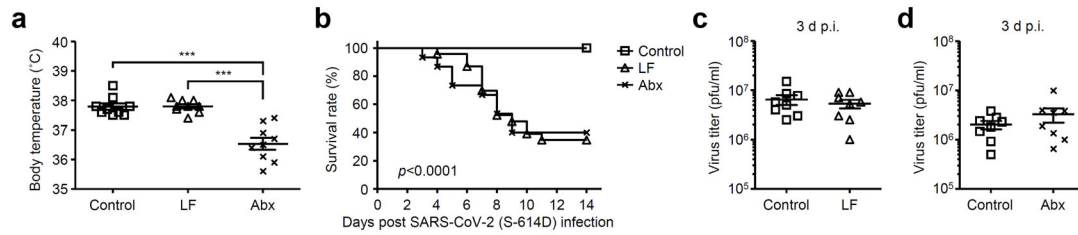

### Extended Data Figure 11

Gut microbiota-derived metabolites protect hamsters from SARS-CoV-2 infection.

**a-d**, Six-weeks-old hamsters were fed a low fiber (LF)-diet (AIN93G) or antibiotics (Abx) in drinking water for 2 weeks before SARS-CoV-2 infection. Core body temperature of LF-fed, Abx-treated, and control uninfected hamsters kept at 22 °C were measured (**a**). LF-fed, Abx-treated, and control hamsters kept at 22 °C were infected intranasally with  $1.5 \times 10^6$  pfu of an original SARS-CoV-2 (S-614D) strain. Mortality (**b**) and virus titer in the lung wash (**c**, **d**) were measured on indicated days after challenge.



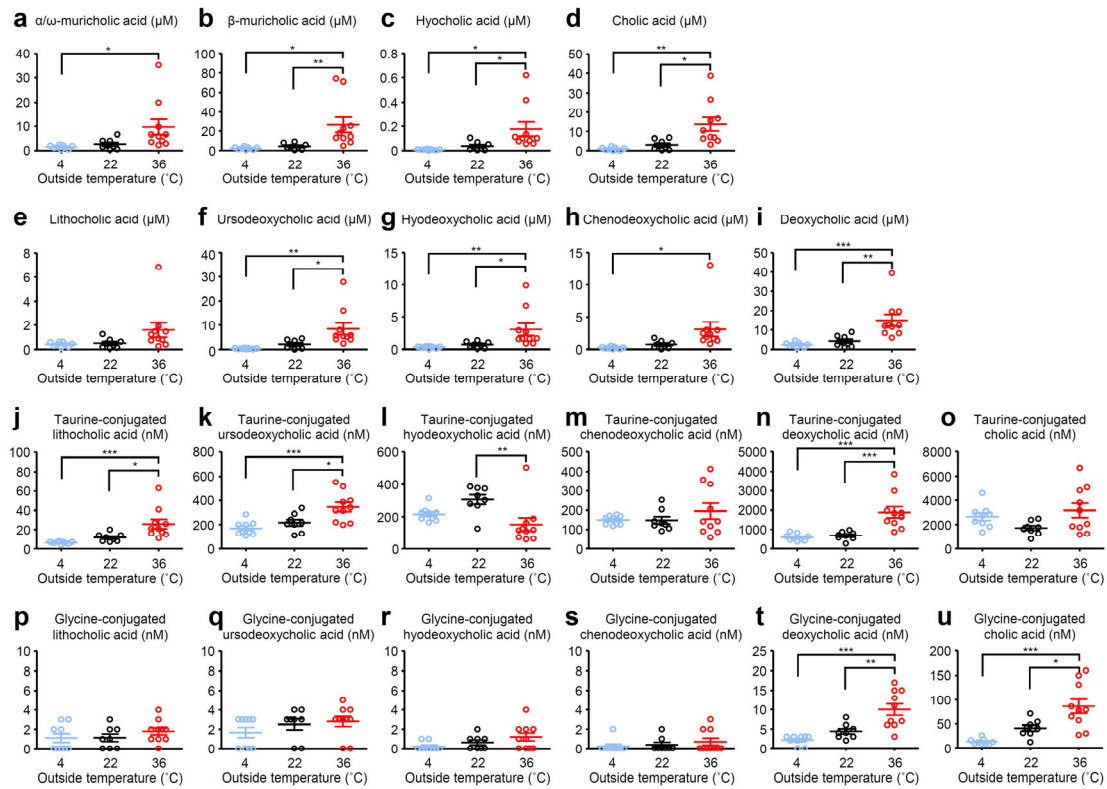

### Extended Data Figure 13

The levels of bile acids in serum.

**a-u**, Mice were kept at 4, 22, or 36 °C for 7 d. The levels of bile acids in cecal contents were measured.

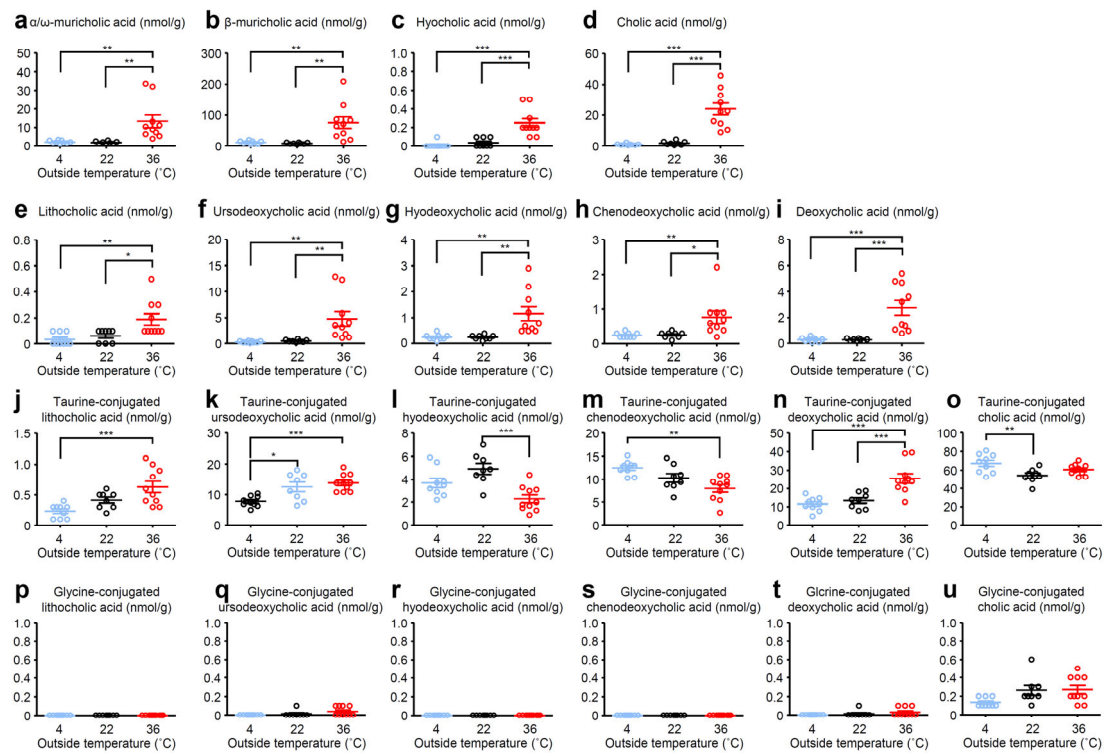

## Extended Data Figure 14

The levels of bile acids in Liver.

**a-u**, Mice were kept at 4, 22, or 36 °C for 7 d. The levels of bile acids in serum were measured.

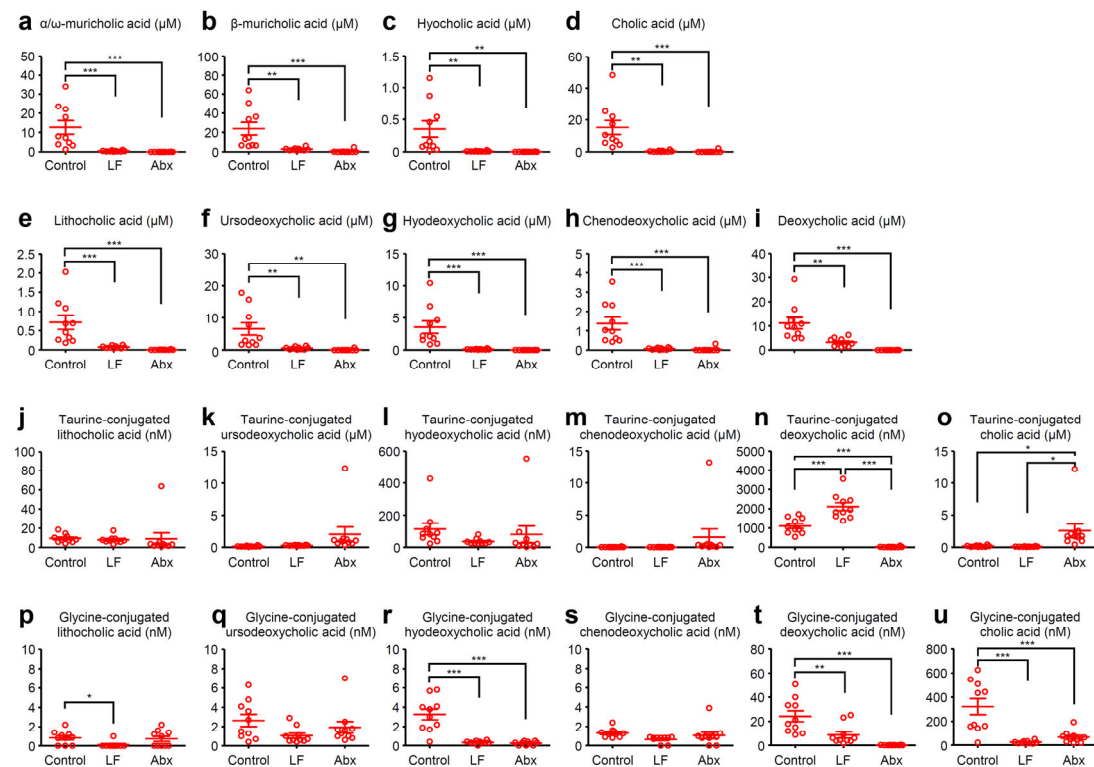

## Extended Data Figure 15

The levels of bile acids in serum of high heat-exposed mice.

**a-u**, LF-fed, Abx-treated, and control mice were kept at 36 °C for 7 d. The levels of bile acids in serum were measured.

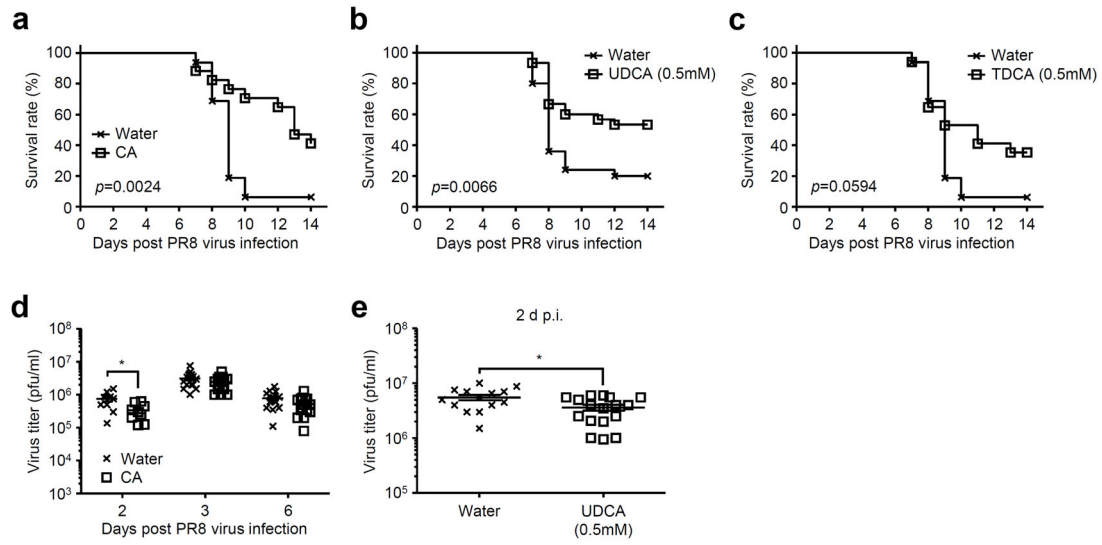

### Extended Data Figure 16

Bile acids protect mice from influenza virus infection.

**a-e**, CA- (**a**, **d**), UDCA- (**b**, **e**) or TDCA-treated (**c**) mice kept at 22 °C were infected intranasally with 1,000 pfu of influenza virus. Mortality (**a-c**) and virus titer in the lung wash (**d**, **e**) were measured on indicated days after challenge.

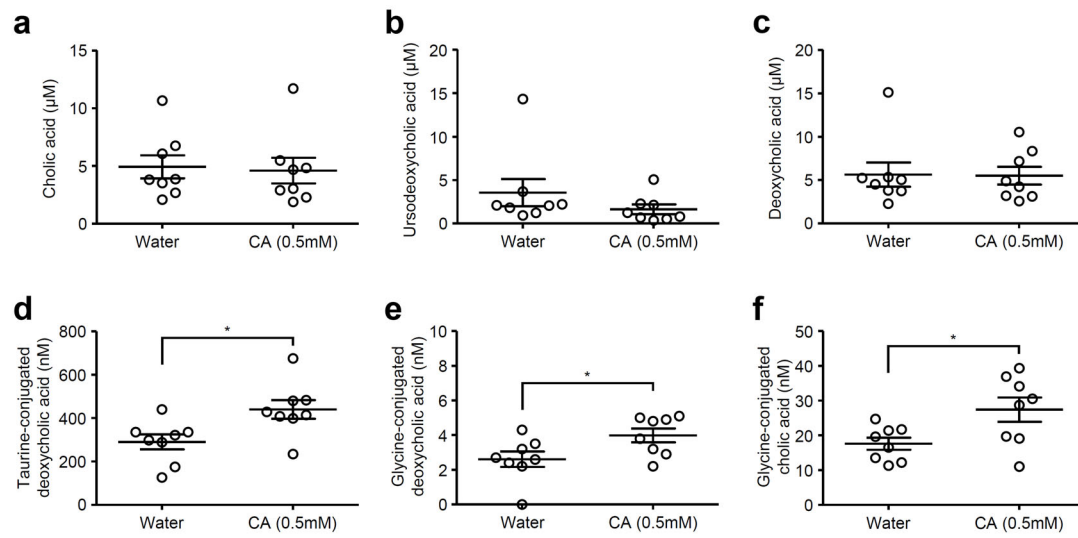

### Extended Data Figure 17

The levels of bile acids in serum of control or CA-treated mice.

**a-f**, CA-treated or control mice were kept at 22°C for 7 d. The levels of bile acids in serum were measured.

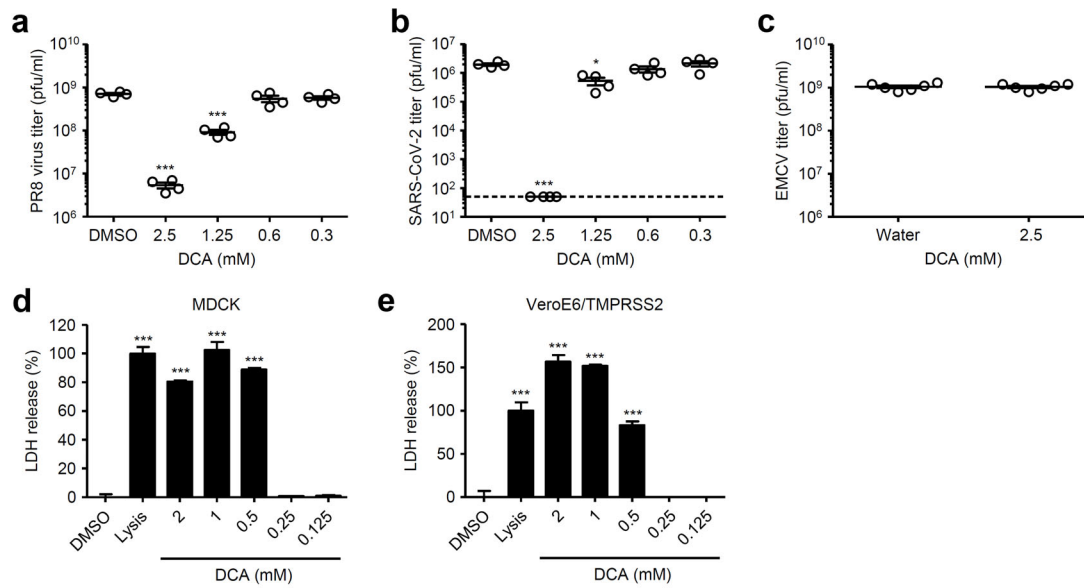

### Extended Data Figure 18

Bile acids directly disrupt enveloped viruses.

**a-c**, Influenza virus (**a**), SARS-CoV-2 (**b**), and EMCV (**c**) were incubated with indicated amounts of DCA at 37 °C for 1 h. Virus titers were measured by standard plaque assay using MDCK (**a**), VeroE6/TMPRSS2 (**b**), or L929 cells (**c**). **d, e**, Uninfected-MDCK (**d**) or VeroE6/TMPRSS2 (**e**) cells were cultured in the presence or absence of indicated amounts of DCA for 24 h. LDH activity was measured for cytotoxicity.

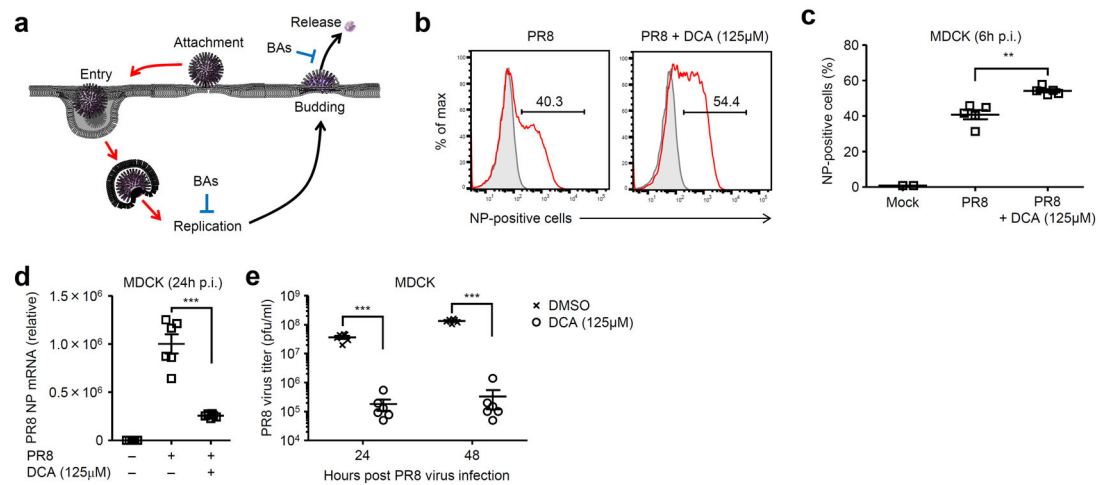

## Extended Data Figure 19

Bile acids inhibit influenza virus replication.

**a**, Effects of bile acids (BAs) on influenza virus replication. Red arrows indicate enhancement. Blue blunt ended bars indicate inhibition. **b-e**, MDCK cells were infected with influenza virus in the presence or absence of 125  $\mu$ M of DCA. Cells were collected at 6 h post infection, and intracellularly stained with nucleoprotein (NP)-specific antibody (**b**). Percentages of NP-positive cells are shown (**c**). Total RNAs were extracted from uninfected or virus-infected cells at 24 h p.i. and influenza virus NP mRNA levels were assessed by quantitative reverse transcription PCR (**d**). Cell-free supernatants were collected at 24 and 48 h p.i. and analyzed for virus titer by standard plaque assay using MDCK cells (**e**).

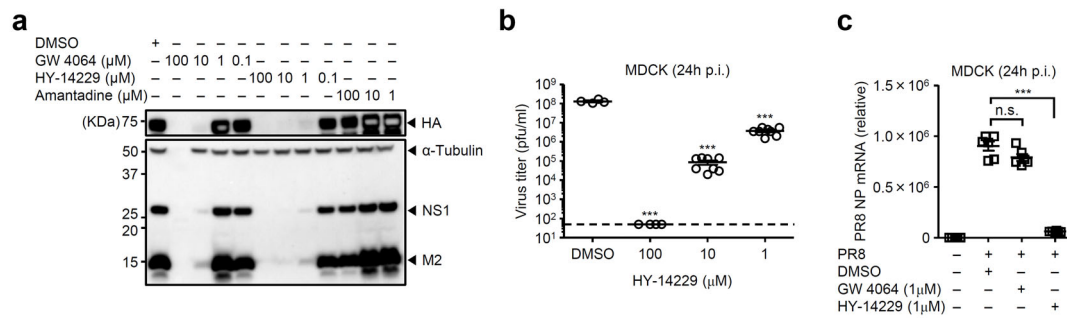

## Extended Data Figure 20

Effects of TGR5 and FXR agonists on influenza virus replication.

**a-c**, MDCK cells were infected with influenza virus PR8 (an amantadine-resistant strain) in the presence or absence of indicated amounts of GW 4064, HY-14229, or amantadine. Cell lysates were collected at 24 h p.i. and analyzed by immunoblotting with indicated antibodies (**a**). Cell-free supernatants were collected at 24 h p.i. and analyzed for virus titer by standard plaque assay using MDCK cells (**b**). Total RNAs were extracted from uninfected or virus-infected cells at 24 h p.i. and influenza virus NP mRNA levels were assessed by quantitative reverse transcription PCR (**c**).

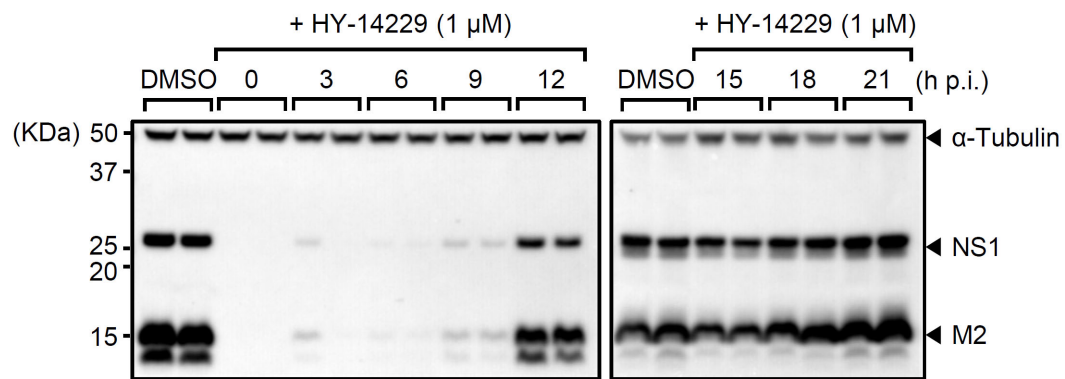

### Extended Data Figure 21

Therapeutic effects of HY-14229 on influenza virus replication.

MDCK cells were infected with influenza virus PR8. After infection, the culture medium was replaced with medium with 1  $\mu$ M of HY-14229 at indicated time points. Cell lysates were collected at 24 h p.i. and analyzed by immunoblotting with indicated antibodies.

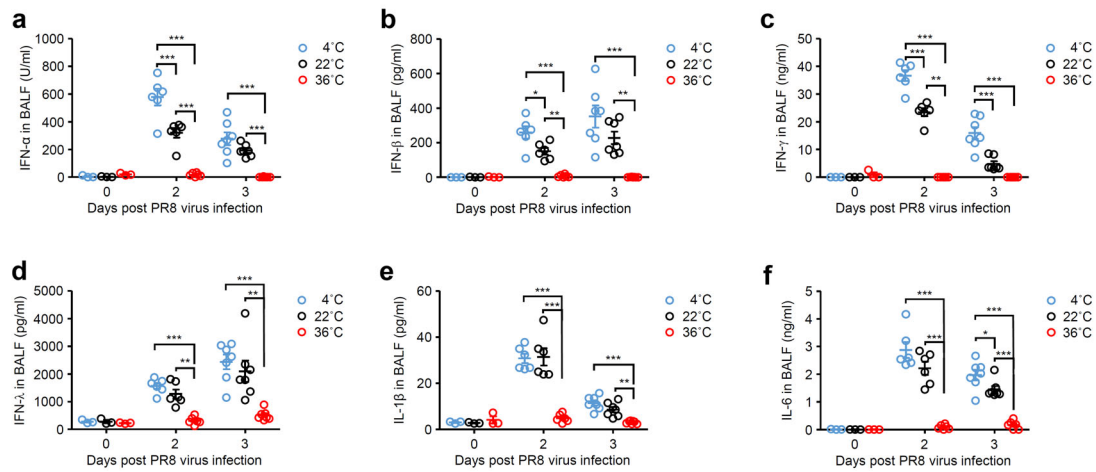

## Extended Data Figure 22

Effects of outside temperature on influenza virus-induced cytokine production.

**a-f**, Mice were kept at 4, 22, or 36 °C for 7 d before influenza virus infection and throughout infection. Mice kept at 4, 22, or 36 °C were infected intranasally with 1,000 pfu of influenza virus. The lung washes were collected at indicated time points and analyzed for IFN- $\alpha$  (**a**), IFN- $\beta$  (**b**), IFN- $\gamma$  (**c**), IFN- $\lambda$  (**d**), IL-1 $\beta$  (**e**), and IL-6 (**f**).

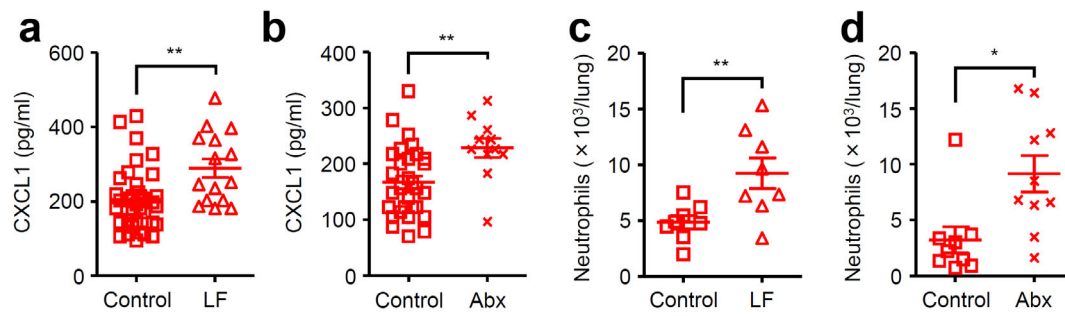

### Extended Data Figure 23

Effects of outside temperature on influenza virus-induced cytokine production.

**a-d**, LF-fed, Abx-treated, and control mice kept at 36 °C were infected intranasally with 1,000 pfu of influenza virus. The lung washes were collected at 4 d p.i. and analyzed for CXCL1 by ELISA (**a**, **b**). Lymphocytes were isolated from the lung at 7 d p.i.. The number of Ly6C<sup>+</sup> Ly6G<sup>+</sup> neutrophils were analyzed by flow cytometry (**c**, **d**).

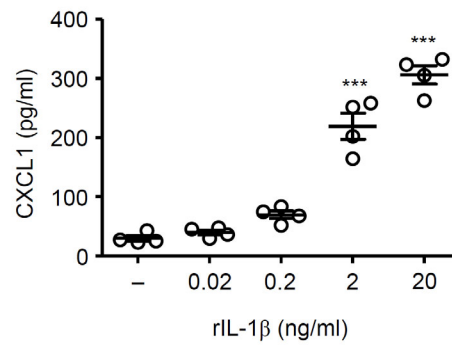

### Extended Data Figure 24

Treatment of BMMs with IL-1 $\beta$  stimulates CXCL1 production.

BMMs were stimulated with indicated amounts of recombinant mouse IL-1 $\beta$  (rIL-1 $\beta$ ). Cell-free supernatants were collected at 24 h post stimulation and analyzed for CXCL1 by ELISA.

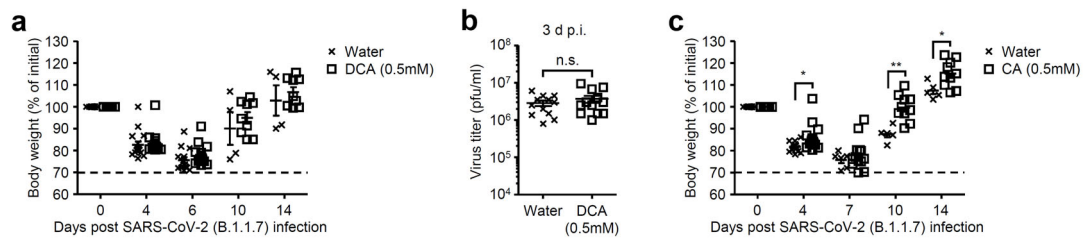

## Extended Data Figure 25

Weight loss and virus titer of SARS-CoV-2-infected hamsters.

**a-c**, DCA- (**a**, **b**) or CA-treated (**c**) hamsters kept at 22°C were infected intranasally with  $1.5 \times 10^6$  pfu of SARS-CoV-2 B.1.1.7 (alpha) variant. Weight loss (**a**, **c**) and virus titer in the lung wash (**b**) were measured on indicated days after challenge. The dashed line indicates the limit of endpoint.

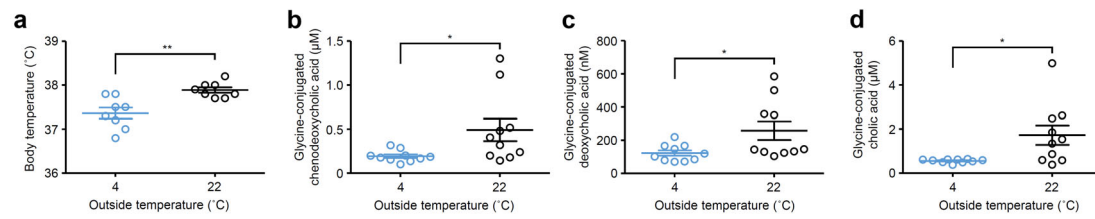

## Extended Data Figure 26

Body temperature and the levels of bile acids in serum of cold- and RT-exposed hamsters.

**a-d**, Hamsters were kept at 4 or 22 °C for 7 d. Core body temperature (**a**) and the levels of bile acids in serum (**b**) of naïve hamsters were measured.

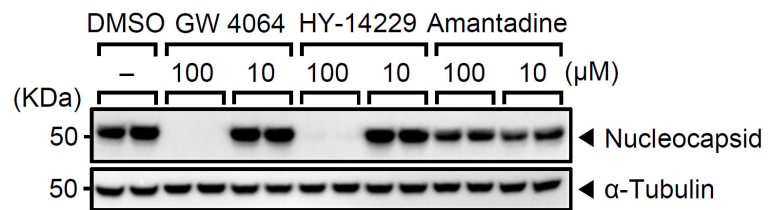

### Extended Data Figure 27

Effects of TGR5 and FXR agonists on SARS-CoV-2 replication.

VeroE6/TMPRSS2 cells were infected with original SARS-CoV-2 (S-614D) in the presence or absence of indicated amounts of GW 4064, HY-14229, or amantadine. Cell lysates were collected at 24 h p.i. and analyzed by immunoblotting with indicated antibodies.

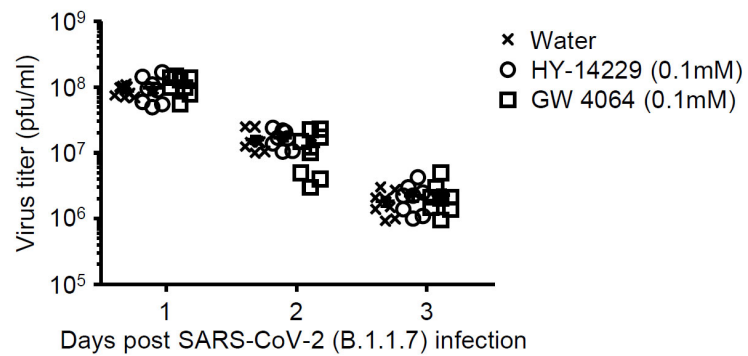

### Extended Data Figure 28

Effects of TGR5 and FXR agonists on SARS-CoV-2 replication in hamsters.

HY-14229-, GW 4064-treated or control hamsters kept at 22°C were infected intranasally with  $1.5 \times 10^6$  pfu of SARS-CoV-2 B.1.1.7 (alpha) variant. Virus titers in the lung washes were measured on indicated days after challenge.

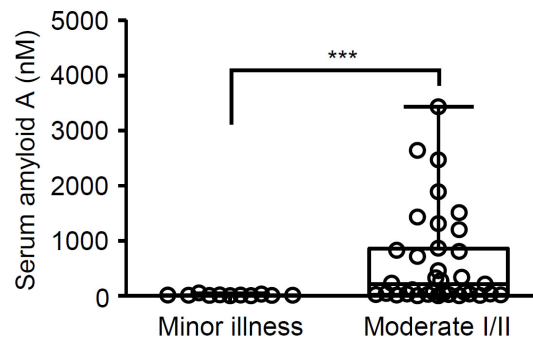

### Extended Data Figure 29

Level of serum amyloid A in plasma of COVID-19 patients.

Concentrations of serum amyloid A in plasma of minor (n = 11) versus moderate I/II (n = 35) groups were measured. Each dot represents a unique patient.

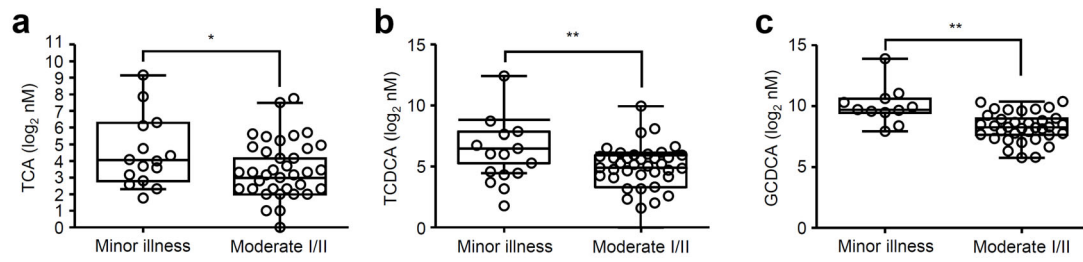

### Extended Data Figure 30

Levels of bile acids in plasma of COVID-19 patients.

**a-c**, Concentrations of taurine-conjugated CA (TCA) (**a**), taurine-conjugated chenodeoxycholic acid (TCDCA) (**b**), and glycine-conjugated chenodeoxycholic acid (GCDCA) (**c**) in plasma of minor (n = 11) versus moderate I/II (n = 35) groups were measured. Each dot represents a unique patient.

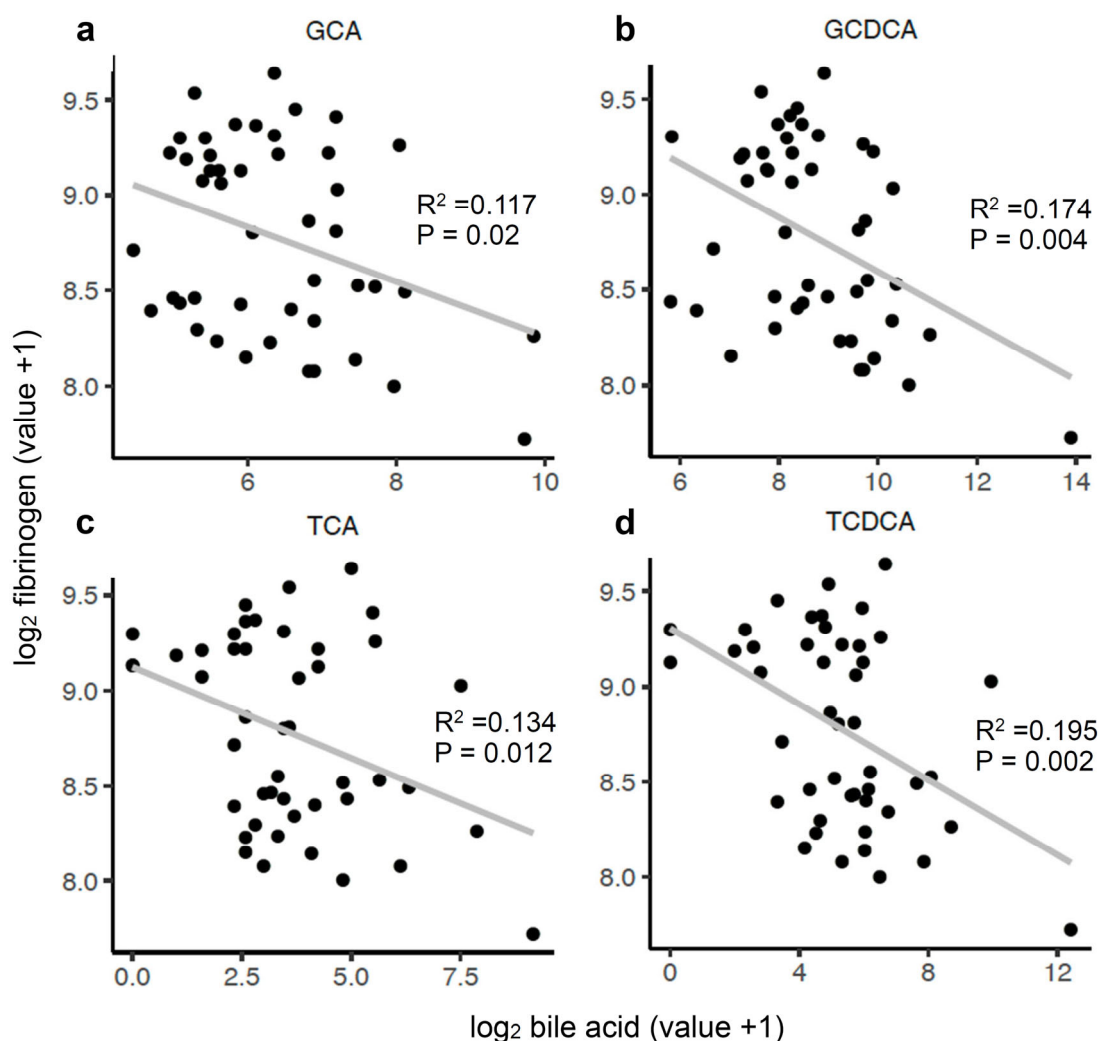

### Extended Data Figure 31

The levels of plasma bile acids in COVID-19 patients were negatively correlated with the level of plasma fibrinogen as a biomarker of COVID-19 disease severity.

**a-d**, Scatterplots of the levels of plasma bile acids and a fibrinogen. Individual patients are represented as black circles. The solid gray line shows the regression line. R<sup>2</sup> and P values were calculated based on the linear regression and the Wald test, respectively. GCA: glycine-conjugated cholic acid, GCDCA: glycine-conjugated chenodeoxycholic acid, TCA: taurine-conjugated cholic acid, TCDCA: taurine-conjugated chenodeoxycholic acid.

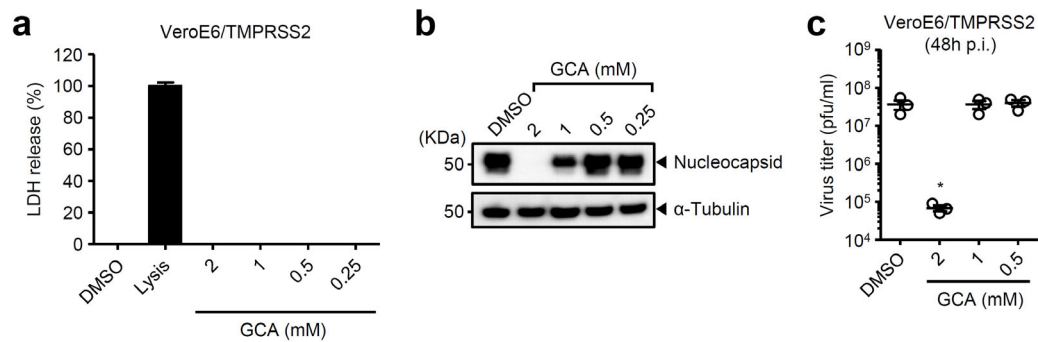

### Extended Data Figure 32

GCA inhibits SARS-CoV-2 replication.

**a**, Uninfected-VeroE6/TMPRSS2 cells were cultured in the presence or absence of indicated amounts of GCA for 24 h. LDH activity was measured for cytotoxicity. **b, c**, VeroE6/TMPRSS2 cells were infected with original SARS-CoV-2 (S-614D) in the presence or absence of indicated amounts of GCA. Cell lysates were collected at 24 h p.i. and analyzed by immunoblotting with indicated antibodies (**b**). Cell-free supernatants were collected at 48 h p.i. and analyzed for virus titer by standard plaque assay using VeroE6/TMPRSS2 cells (**c**).
